# Supplementary material
Source: PubMed Central journal article supplement (PMC7486529)
Supplement: ajcd0010-0150-f3.pdf [file ajcd0010-0150-f3.pdf]

# RV strain and VAC in TAVI

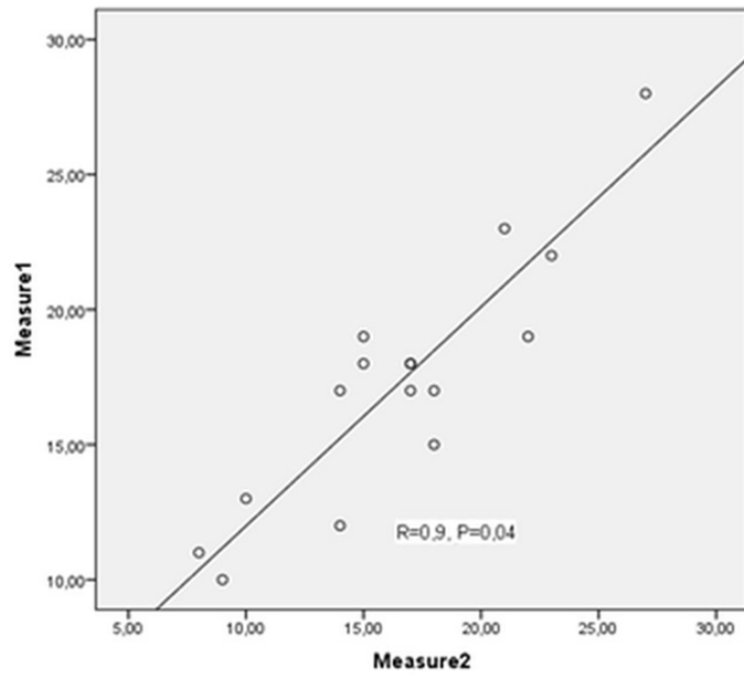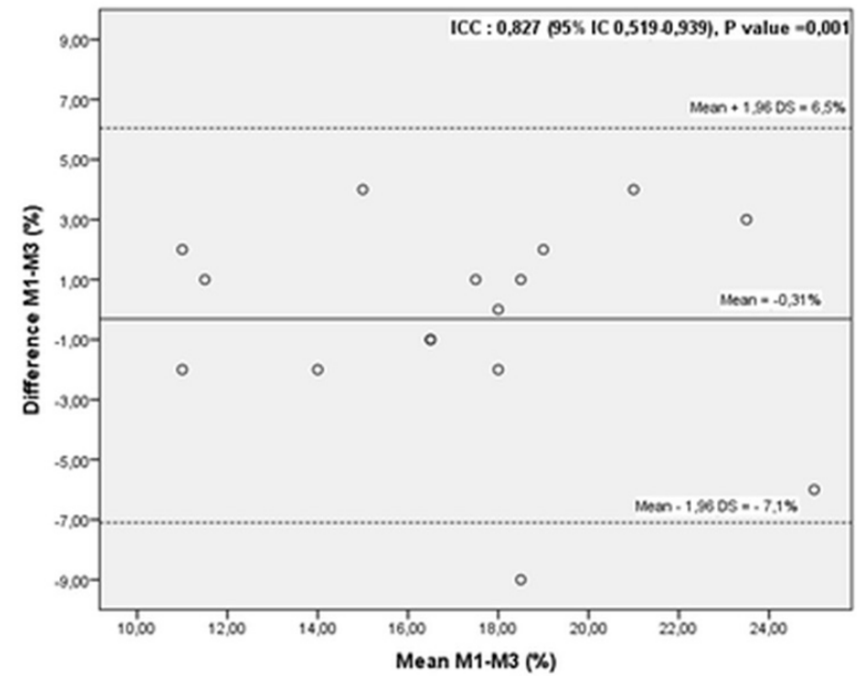

## RV strain and VAC in TAVI

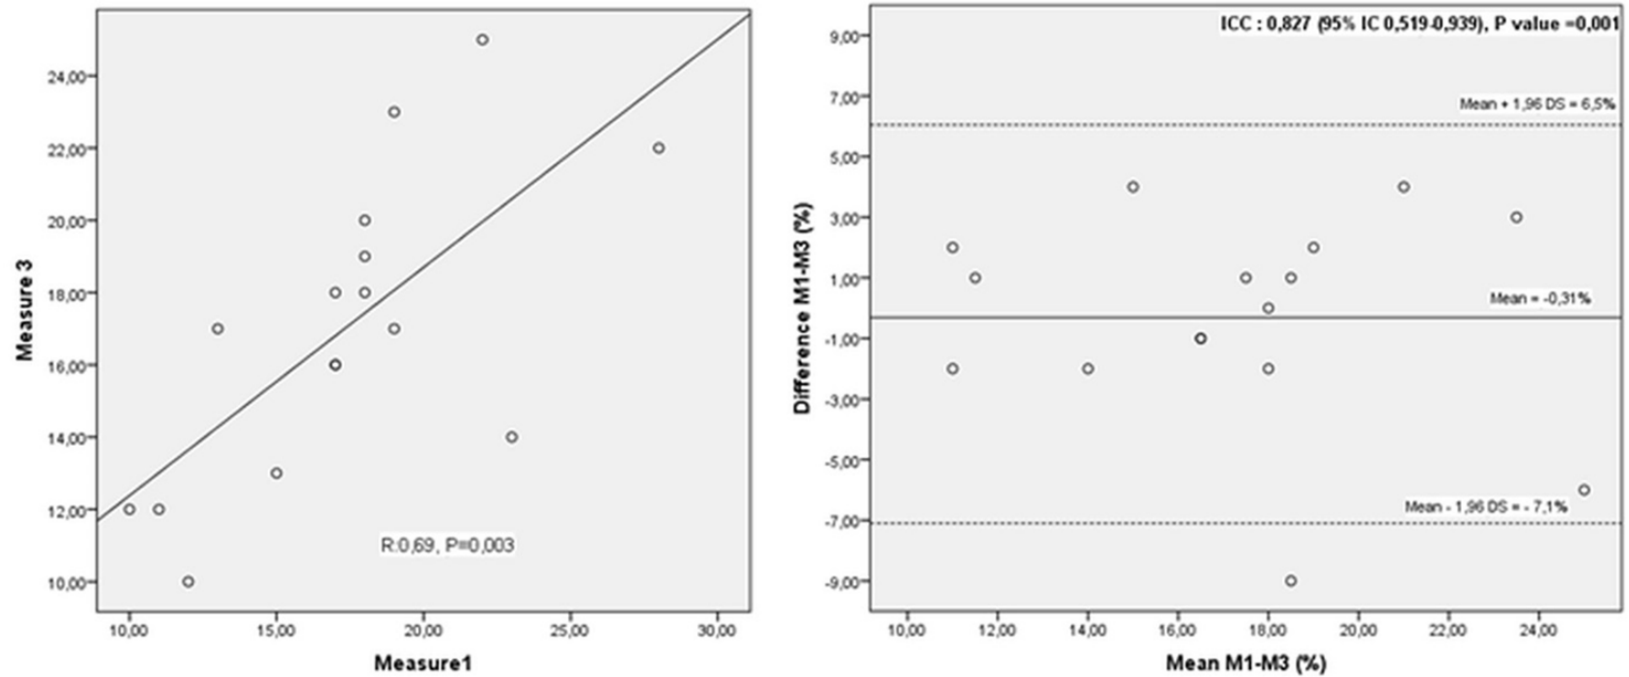

**Supplementary Figure 1.** Intraobserver and interobserver variability; scatterplots and Bland-Altman plots for measurements of RVLS. Pearson's correlation coefficient (R), intraclass correlation coefficient (ICC), and Bland-Altman bias with LOA are provided for intraobserver variability (upper two images) and for interobserver variability (lower two images).
